# Supplementary material for: Mouse CD146+ muscle interstitial progenitor cells differ from satellite cells and present myogenic potential
Source: PubMed Central journal article supplement (PMC7409690; doi:10.1186/s13287-020-01827-z), 2020-08-06

A

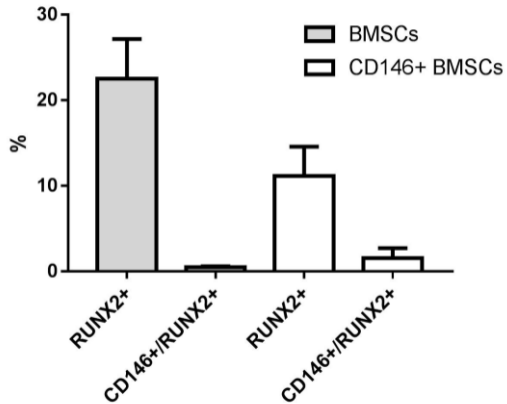

B

CD146/RUNX2/nuclei

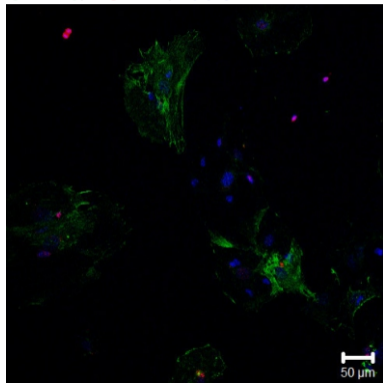

Supplement: 13287_2020_1827_MOESM1_ESM.pdf [file 13287_2020_1827_MOESM1_ESM.pdf]
